# Supplementary material
Source: PubMed Central journal article supplement (PMC3478954)
Supplement: NIHMS407408-supplement-01.pdf [file NIHMS407408-supplement-01.pdf]

# Supplemental Fig S1.

**A**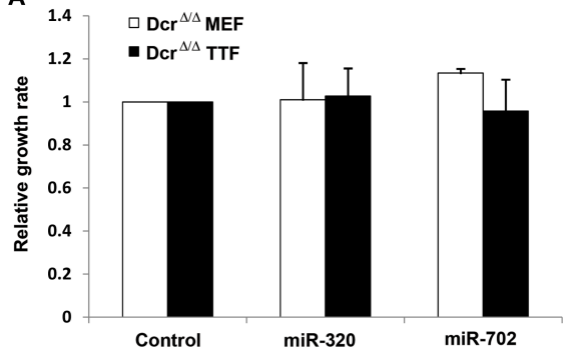**B**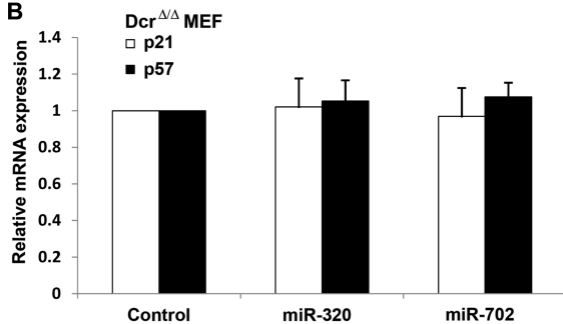**C**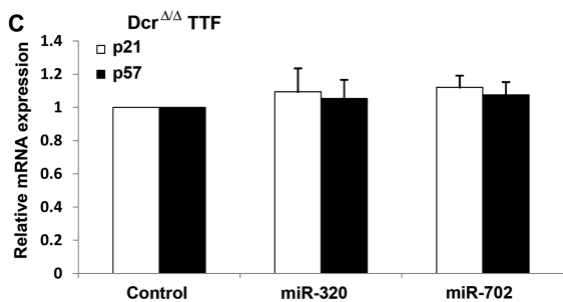

**Supplemental Fig S1. miR-320 and miR-702 do not have pro-proliferative effect in MEFs or adult TTFs.** (A) Unlike ESCs, the growth rate of Dicer-deficient MEFs and TTFs did not change significantly with the introduction of miR-320. Similarly, miR-702 did not increase the proliferation rate of Dicer-deficient TTFs although it did slightly enhance proliferation of Dicer-deficient MEFs by 13%. Each value is represented relative to an assigned control value of 1.0. Data are presented as mean +/- SD with N=3. (B, C) Consistent with the lack of significant growth promoting effect on Dicer-deficient MEFs and TTFs, miR-320 and miR-702 did not repress expression levels of p57 and p21 in these cell types. Each value is represented relative to an assigned control value of 1.0. Data are presented as mean +/- SD with N=3.
