# Supplementary material
Source: PubMed Central journal article supplement (PMC3478954)
Supplement: NIHMS407408-supplement-02.pdf [file NIHMS407408-supplement-02.pdf]

**Supplemental Table S1. Oligonucleotide primers used in this study.**

| <b>Name</b>            | <b>Sequence (5' to 3')</b>                       |
|------------------------|--------------------------------------------------|
| <b>qPCR primers</b>    |                                                  |
| miR-344                | TGATCTAGCCAAAGCCTGACTGT                          |
| miR-29c-3p             | TAGCACCATTGAAATCGGTTA                            |
| miR-301a-3p            | CAGTGCAATAGTATTGTCAAAGC                          |
| miR-320-3p             | AAAAGCTGGGTTGAGAGGGCGA                           |
| miR-322-3p             | AAACATGAAGCGCTGCAACAC                            |
| miR-324-3p             | CCACTGCCCCAGGTGCTGCT                             |
| miR-342-3p             | TCTCACACAGAAATCGCACCCGT                          |
| miR-484                | TCAGGCTCAGTCCCCTCCCGAT                           |
| miR-652-3p             | AATGGCGCCACTAGGGTTGTG                            |
| miR-668-3p             | TGTCACTCGGCTCGGCCCACTACC                         |
| miR-702                | TGCCACCCCTTACCCCGCTC                             |
| miR-877-5p             | GTAGAGGAGATGGCGCAGGG                             |
| miR-1981-5p            | GTAAAGGCTGGGCTTAGACGTGGC                         |
| mU6 snRNA              | TGGCCCTGCGCAAGGATG                               |
| m18S RNA fw            | GGAAGGGCACCACCAGGAGT                             |
| m18S RNA rv            | TGCAGCCCCGGACATCTAAG                             |
| Poly(T) adapter        | GCGAGCACAGAATTAATACGACTCACTATAGGTTTTTTTTTTTTTVN* |
| Adapter Reverse        | GCGAGCACAGAATTAATACGAC                           |
| p21-Fw                 | CGAGAACGGTGGAACTTTGAC                            |
| p21-Rv                 | CAGGGCTCAGGTAGACCTTG                             |
| p27-Fw                 | GGCCAACAGAACAGAAGAAAATGT                         |
| p27-Rv                 | GGGCGTCTGCTCCACAGT                               |
| p57-Fw                 | CGAGGAGCAGGACGAGAATC                             |
| p57-Rv                 | GAAGAAGTCGTTTCGCATTGGC                           |
| b-actin-Fw             | CACAGCTTCTTTGCAGCTCCTT                           |
| b-actin-Rv             | CGTCATCCATGGCGAACTG                              |
| GAPDH-Fw               | TGTTGCCATCAATGACCCCTT                            |
| GAPDH-Rv               | CTCCACGACGTACTIONCAGCG                           |
| <b>Cloning primers</b> |                                                  |
| pmirGLO-Sequencing-Fw  | GCGAGATTCTCATTAAAGGCC                            |
| pmirGLO-Sequencing-Rv  | AGCCAACCTCAGCTTCCTTTC                            |
| p21 3'UTR-Fw           | ATCTCGAGAGAGAAAACCCTGAAGTGCC                     |
| p21 3'UTR-Rv           | GCTCTAGATATTGAGCACCAGCTTTGGG                     |
| p27 3'UTR-Fw           | ATCTCGAGGACGTAAACAGCTCCGAATT                     |
| p27 3'UTR-Rv           | GCTCTAGAGATTGCTTGATGTGTAACAATAATTGG              |
| p57 3'UTR-Fw           | ATCTCGAGGTTAGTTTAGAGGCTAACGG                     |
| p57 3'UTR-Rv           | GCTCTAGATTATTTAGAACCTGGCGGAC                     |
| p21-Mut-P2-Rv          | agataagTTTaccaccaccacca                          |
| p21-Mut-P3-Fw          | tgggggtAAAacttatctgggat                          |
| p57-Mut1-P2-Rv         | tgatttCCCgctttacaccttg                           |
| p57-Mut1-P3-Fw         | gtaaagcGGGaaatcatttatgta                         |
| p57-Mut2-P2-Rv         | aatctgCCTctggtgatttctag                          |
| p57-Mut2-P3-Fw         | caccagAGGcagattaccacaa                           |
